1 **Exposure to a mixture of BMAA and MCLR synergistically modulates behavior in**  
2 **larval zebrafish while exacerbating molecular changes related to**  
3 **neurodegeneration.**

4  
5 Rubia M. Martin, Michael S. Bereman and Kurt C. Marsden

6 Department of Biological Sciences, North Carolina State University, Raleigh, NC

7  
8 Submitted to: Toxicological Sciences

9 Submitted:

10 Pages: 26, Figures: 5, Tables: 2

11 Supplemental Figures: 2

12 Supplemental Tables: 6

13 Running Title: Cyanotoxins BMAA and MCLR interact *in vivo*.

14 Keywords: Cyanotoxins; Mixtures; Synergism; Zebrafish; Behavior; Proteomics

15  
16  
17 \*Author for Correspondence

18 Kurt C. Marsden

19 Department of Biological Sciences

20 North Carolina State University

21 Raleigh, NC

22 Phone: 919-515-2589

23 Email: [kcmarsde@ncsu.edu](mailto:kcmarsde@ncsu.edu)

24 **Abstract**

25 Exposure to toxins produced by cyanobacteria (i.e., cyanotoxins) is an emerging health  
26 concern due to their increased occurrence and previous associations with  
27 neurodegenerative disease including amyotrophic lateral sclerosis (ALS). The objective  
28 of this study was to evaluate the neurotoxic effects of a mixture of two co-occurring  
29 cyanotoxins,  $\beta$ -methylamino-L-alanine (BMAA) and microcystin leucine and arginine  
30 (MCLR), using the larval zebrafish model. We combined high-throughput behavior-  
31 based toxicity assays with discovery proteomic techniques to identify behavioral and  
32 molecular changes following 6 days of exposure. While neither toxin caused mortality,  
33 morphological defects, or altered general locomotor behavior in zebrafish larvae, both  
34 toxins increased acoustic startle sensitivity in a dose-dependent manner by at least 40%  
35 ( $p < 0.0001$ ). Furthermore, startle sensitivity was enhanced by an additional 40% in  
36 larvae exposed to the BMAA/MCLR mixture relative to those exposed to the individual  
37 toxins. Supporting these behavioral results, our proteomic analysis revealed a 4-fold  
38 increase in the number of differentially expressed proteins (DEPs) in the mixture-  
39 exposed group. Additionally, prediction analysis reveals activation and/or inhibition of 8  
40 enriched canonical pathways (enrichment  $p$ -value  $< 0.01$ ;  $z$ -score  $\geq |2|$ ), including ILK, Rho  
41 Family GTPase, RhoGDI, and calcium signaling pathways, which have been implicated  
42 in neurodegeneration. We also found that expression of TDP-43, of which cytoplasmic  
43 aggregates are a hallmark of ALS pathology, was significantly upregulated by 5.7-fold  
44 following BMAA/MCLR mixture exposure. Together, our results emphasize the  
45 importance of including mixtures of cyanotoxins when investigating the link between  
46 environmental cyanotoxins and neurodegeneration as we reveal that BMAA and MCLR

47 interact *in vivo* to enhance neurotoxicity.

48

## 49 **1. Introduction**

50 Amyotrophic lateral sclerosis (ALS) is the most common neurodegenerative  
51 disease of midlife and is rapidly fatal with a median survival period of three years from  
52 symptom onset (Brown and Al-Chalabi 2017). It is defined by a progressive loss of both  
53 upper and lower motor neurons, resulting in muscle spasticity, weakness, and atrophy  
54 (Swinnen and Robberecht 2014). Approximately 10% of ALS cases are classified as  
55 familial due to the inheritance of single gene mutations (Renton et al. 2014). For the  
56 remaining 90% of cases the disease etiology is unknown and likely stems from a  
57 complex interplay between genetic and environmental factors. (Ingre et al. 2015; Jones  
58 2009). Although the contribution of environmental factors to sporadic ALS (sALS) is  
59 difficult to assess as the search space is infinite, several studies have associated ALS  
60 incidence with exposure to heavy metals, pesticides, and electromagnetic fields  
61 (reviewed in (Bozzoni 2016)). In addition, there is also strong evidence that exposure to  
62 cyanotoxins is a major risk factor for sALS (Bradley and Mash 2009).

63 The link between beta-methylamino-L-alanine (BMAA), a toxin produced by a  
64 diverse taxa of cyanobacteria (Cox et al. 2005) and sALS was first observed on the  
65 island of Guam in the 1950s (Kurland and Mulder 1955). The indigenous population of  
66 Guam succumbed to an ALS/parkinsonism-dementia (PD) neurodegenerative complex  
67 with a 100-fold greater incidence than the rest of the world (Bradley and Mash 2009).  
68 The elevated rates of ALS/PD in Guam were attributed to BMAA exposure as the  
69 indigenous population consumed flour made from BMAA-containing cycad seeds as

70 well as flying foxes in which BMAA was biomagnified up to 10,000-fold greater than in  
71 free living bacteria (3,556  $\mu\text{g/g}$  BMAA) (Banack and Cox 2003). Since then, numerous  
72 studies have implicated BMAA in sALS cases outside of Guam, including clusters of  
73 ALS along the French Mediterranean coast, New Hampshire, and Maryland (Caller et  
74 al. 2009; Field et al. 2013; Masseret et al. 2013). These epidemiological studies provide  
75 evidence that exposure to BMAA is associated with neurodegeneration. Epidemiological  
76 findings are further supported by laboratory studies in which BMAA was found to cause  
77 neurotoxic effects consistent with neurodegenerative disease (Beri et al. 2017; Karlsson  
78 et al. 2017). Furthermore, neonatal BMAA exposure in rats has been shown to produce  
79 motor defects in rats (Scott et al. 2017), indicating that exposure during neural  
80 developmental may enhance sALS risk. However, a major limitation for these and many  
81 other BMAA studies is that BMAA is just one of many toxic metabolites produced by  
82 cyanobacteria, some of which have been reported to co-occur with BMAA around the  
83 world (Banack et al. 2015; Sabart et al. 2015). Thus, to obtain a more thorough  
84 understanding of the risk posed by exposure to cyanotoxic blooms, it is essential to  
85 investigate the toxicity of other cyanotoxins with BMAA.

86 BMAA at low concentrations ( $\sim 10 \mu\text{M}$ ) in combination with other non-cyanotoxic  
87 neurotoxins has been found to potentiate neuronal damage *in vitro* (Lobner et al. 2006).  
88 More recently, our laboratory demonstrated that co-exposure to BMAA and its isomers  
89 (i.e., AEG and 2,4DAB) at low concentrations ( $\sim 166 \mu\text{M}$ ) produces a synergistic  
90 interaction *in vitro*, perturbing regulation of various canonical pathways, bioprocesses,  
91 and upstream regulators involved in neurodegenerative processes (Martin et al. 2019).  
92 Recent studies have shown that microcystin leucine-arginine (MCLR) is also a potent

93 neurotoxin (Tzima et al. 2017; Wu et al. 2016), and like BMAA, MCLR can  
94 bioaccumulate in tissues (Wang et al. 2008; Zhao et al. 2015). Microcystins are the  
95 most abundant cyanotoxins in the environment and have been shown to co-occur with  
96 BMAA (Banack et al. 2015; Jungblut et al. 2018; Metcalf et al. 2012). Therefore, co-  
97 exposure to BMAA and MCLR is of increasing toxicological significance.

98 To identify potential neurotoxic effects *in vivo*, we exposed larval zebrafish to  
99 BMAA and/or MCLR and assessed neural function with a set of behavioral assays using  
100 a high-throughput testing platform. While neither BMAA nor MCLR caused changes in  
101 locomotion, both toxins increased acoustic startle sensitivity in a dose-dependent  
102 manner. Furthermore, a mixture of BMAA and MCLR enhanced toxicity in the startle  
103 assay. Finally, we examined the protein profile of larval zebrafish exposed to the  
104 BMAA/MCLR mixture and identified molecular signatures consistent with  
105 neurodegeneration, including upregulation of the ALS-associated protein TDP-43  
106 (Mackenzie et al. 2010). Together, our data highlight the importance of studying toxic  
107 mixtures and reveal novel mechanisms that may link cyanotoxin exposure to sALS.

## 108 **2. Materials and Methods**

### 109 2.1. Chemicals

110 Synthetic BMAA standards were obtained from Sigma Aldrich (St. Louis, MO, USA),  
111 and purified MCLR (purity > 95%) was obtained from Enzo Life Sciences, Inc.  
112 (Farmingdale, NY, USA). Water, acetonitrile, methanol, acetic acid, and formic acid  
113 were all Optima LC–MS grade solvents purchased from Fisher Scientific (Tewksbury,  
114 MA, USA). A stock solution of BMAA at 10 mg.mL<sup>-1</sup> and MCLR at 1 mg.mL<sup>-1</sup> was used

115 for all dilutions. All BMAA dilutions were prepared in HPLC grade water while MCLR  
116 dilutions were prepared in DMSO.

## 117 2.2. Zebrafish husbandry and exposures

118 All animal use and procedures were approved by the North Carolina State  
119 University IACUC. Zebrafish (*Danio rerio*) embryos from multiple crosses of wild-type  
120 tupfel longfin (TLF) strain adults were collected and placed into Petri dishes containing  
121 E3 medium, and unfertilized eggs were removed as described previously (Burgess and  
122 Granato 2007). Embryos from all clutches were mixed and randomly sorted into 24 well  
123 plates (8-10 animals per well) containing 1 mL of E3 per well.

124 At 6 hpf, all E3 was removed and replaced with vehicle (HPLC-grade water), 100,  
125 500, or 1000  $\mu$ M BMAA in E3, vehicle (DMSO), 1, 2.5, 5, or 10  $\mu$ M MCLR in E3, or 100  
126  $\mu$ M BMAA plus 1  $\mu$ M MCLR in E3. All treatments were performed in triplicate and were  
127 repeated in each of 3 separate experiments. Embryos were incubated at 29°C on a  
128 14h:10h light-dark cycle, and 100% of the media was exchanged for fresh solutions  
129 daily. Embryos/ larvae were exposed to treatments until 6 days post fertilization (6 dpf).

## 130 2.3 Behavior assays and analysis

131 All 6 dpf larvae were thoroughly screened for developmental defects, and those  
132 with uninflated swim bladder, edema, or other morphological defects were removed  
133 from analysis. Screened larvae were adapted to the testing lighting and temperature  
134 conditions for 30 minutes prior to testing. Behavior testing was done as previously  
135 described (Burgess and Granato 2007; Marsden et al. 2018). Briefly, 6 dpf larvae were  
136 transferred to individual 9 mm round wells on a 36-well laser-cut acrylic testing grid.  
137 Larvae acclimated for 5 min and then spontaneous locomotor activity was recorded for

138 18.5 min at 640 x 640 px resolution at 50 frames per sec (fps) using a Photron mini UX-  
139 50 high-speed camera. The same set of larvae were then presented with a total of 60  
140 acoustic stimuli, 10 at each of 6 intensities (13.6, 25.7, 29.2, 35.5, 39.6, and 53.6 dB),  
141 with a 20s interstimulus interval (ISI). Startle responses were recorded at 1000 fps.  
142 Stimuli were delivered by an acoustic-vibrational shaker (Bruel and Kjaer) to which the  
143 testing grid was directly mounted. All stimuli were calibrated with a PCB Piezotronics  
144 accelerometer (#355B04) and signal conditioner (#482A21), and voltage outputs were  
145 converted to dB using the formula  $\text{dB} = 20 \log V$ . Analysis of recorded behaviors was  
146 done using FLOTE software as described previously (Burgess and Granato 2007;  
147 Marsden et al. 2018). Short-latency C-bends (SLCs) and long-latency C-bends (LLCs)  
148 were determined by defined kinematic parameters. A startle sensitivity index was  
149 calculated for individual larvae by calculating the area under the curve of startle  
150 frequency versus stimulus intensity using Prism 8 software (GraphPad). Statistical  
151 analyses were performed using JMP pro 14 from SAS institute, Cary, NC. Data were  
152 analyzed for effects between the groups (comparison of means), using Tukey-Kramer  
153 HSD, Alpha 0.05. Violin plots were generated using Prism 8.

## 154 2.4 Proteomics analysis

### 155 *Sample preparation and LC MS/MS*

156 Details of sample preparation, protein extraction and digestion via filter aided  
157 sample preparation (FASP) can be found in Supplemental Methods. Details regarding  
158 the LC-MS/MS data collection are also provided in the Supplemental Methods. Raw  
159 data files obtained in this experiment have been made available on the Chorus LC-MS  
160 data repository and can be assessed under the project ID#1679.

## 161 *Proteomics Data Analysis*

162 Details for the label free quantitation (LFQ) have been previously described here  
163 (Martin et al. 2019). In brief, LFQ was performed in MaxQuant (version.1.5.60), and  
164 data were searched against the *Danio rerio* Swiss Prot protein database (# protein  
165 sequences = 56 281, accessed 03/22/2019). Comparison of LFQ intensities across the  
166 whole set of measurements was investigated using Perseus software (version 1.5.1.6),  
167 where calculation of statistical significance was determined using two-way Student-t test  
168 and FPR ( $p \leq 0.05$ ).

## 169 *Pathway Analysis*

170 Ingenuity Pathway Analysis (IPA) software was used to identify the function,  
171 specific processes, and enriched pathways of the differentially expressed proteins using  
172 the “Core Analysis” function. Only significantly differentially expressed proteins ( $p \leq$   
173 0.05) were submitted to IPA. We used an empirical background protein database to  
174 evaluate the significance of pathway enrichment. The database was created by using all  
175 of the proteins that were detected in our samples (Bereman et al. 2018; Khatri and  
176 Drăghici 2005).

## 177 **3. Results**

178 An overview of the experimental design is illustrated in **Figure 1**. In brief, we first  
179 conducted a dose-response study to determine the no observed adverse effect levels  
180 (NOAELs) to be implemented in subsequent mixture analyses. Zebrafish larvae were  
181 exposed to increasing concentrations of BMAA or MCLR from 6 hours post-fertilization  
182 (hpf) to 6 days post-fertilization (dpf). At 6 dpf, neurotoxicity was evaluated via two  
183 behavioral assays: spontaneous movement and acoustic startle response assays.



184 Based on these data, a mixture was created using BMAA and MCLR at their respective  
185 NOAELs in which zebrafish larvae were exposed as before, followed by behavior  
186 analysis to identify potential interactions between BMAA and MCLR. Finally, to  
187 investigate perturbed molecular pathways associated with cyanotoxic mixture exposure,  
188 the mixture-exposed group and their respective controls were subjected to shotgun  
189 proteomics.

### 190 *3.1. BMAA and MCLR Dose Response Study: identification of NOAELs*

191 To determine if exposure to environmentally relevant concentrations of BMAA or  
192 MCLR cause neurotoxicity in wild-type zebrafish, we treated TLF strain embryos from 6  
193 hpf to 6 dpf with increasing concentrations of BMAA (100, 500, and 1000  $\mu$ M) and  
194 MCLR (1, 2.5, 5, and 10  $\mu$ M). We did not observe increased mortality, morbidity, or any  
195 overt developmental phenotypes in any of the exposed groups of larvae. First, we  
196 examined the effect of BMAA and MCLR on general locomotion (**Figure 2**) using a  
197 custom built, high-throughput behavior platform and unbiased, automated FLOTE  
198 tracking and analysis software (Burgess and Granato 2007). In order to investigate if  
199 various concentrations of BMAA and/or MCLR could alter spontaneous movement, 6  
200 dpf larvae were adapted to the testing conditions for 30 min, transferred to a multi-well  
201 grid mounted below a high-speed camera, habituated for 5 additional minutes, and then  
202 their spontaneous movements were recorded for 18.5 min. We detected no significant  
203 differences in total distance travelled for zebrafish larvae treated with either BMAA or  
204 MCLR compared to their respective vehicle controls (**Figure 2A**). Average speed was  
205 also unchanged in all groups, except for larvae treated with 1000  $\mu$ M BMAA, whose  
206 speed was significantly reduced (**Figure 2B**). We also examined the frequency of

207 turning and swimming behaviors, as defined by specific kinematic parameters (Hao et al. 2012). There were no significant differences in the ratio of turns to swims in BMAA or  
208 al. 2012). There were no significant differences in the ratio of turns to swims in BMAA or  
209 MCLR treated larvae (**Figure 2C**). The overall frequency of these movements was also  
210 unchanged, except for a slight increase in turn frequency in 10  $\mu$ M MCLR-treated larvae  
211 (**Supplemental Figure 1**). These data indicate that developmental exposure to BMAA  
212 or MCLR does not substantially affect general locomotor activity in larval zebrafish.

213 We then we examined sensorimotor function using an acoustic startle assay  
214 consisting of 60 total stimuli, 10 at each of 6 intensities with a 20 sec inter-stimulus  
215 interval (**Figure 3**). In response to an acoustic stimulus, zebrafish larvae perform one of  
216 two types of high-velocity startle behaviors: Short-latency C-bends (SLCs), which rely  
217 on the Mauthner neurons (Burgess and Granato 2007), or Long-latency C-bends  
218 (LLCs), which are independent of the Mauthner cells but require a set of prepontine  
219 neurons (Marquart et al. 2019). To investigate if BMAA or MCLR alters startle  
220 performance, we measured SLC and LLC frequency across the 60-stimulus assay  
221 (**Figure 3**). **Figure 3A** highlights both the SLC and LLC response frequency disparities  
222 between zebrafish larvae exposed to 1000  $\mu$ M BMAA and vehicle control. 1000  $\mu$ M  
223 BMAA increases SLC responses while decreasing LLC responses, indicating that  
224 BMAA shifts the behavioral response bias toward SLCs.

225 To quantify SLC and LLC sensitivity, we calculated the area under the startle  
226 frequency curves in **Figure 3A** for each individual larva to create a startle sensitivity  
227 index (Marsden et al. 2018). Both BMAA and MCLR increased SLC sensitivity in a  
228 dose-dependent manner (**Figure 3B**). LLC responses decreased in a dose-dependent  
229 manner in both BMAA and MCLR-treated larvae, supporting an overall shift in response

230 bias (**Figure 3C**). These data indicate that environmentally relevant concentrations of  
231 BMAA and MCLR enhance activity of the SLC circuit. In addition, these startle  
232 sensitivity data reveal NOAELs for BMAA (100  $\mu$ M) and MCLR (1  $\mu$ M), with NOAEL was  
233 defined as the highest non-statistically significant dose tested.

### 234 *3.2. BMAA and MCLR Mixture Study: Interaction Amongst Cyanotoxins at a Behavioral* 235 *Level*

236 We next aimed to assess whether BMAA and MCLR interact *in vivo* by  
237 measuring the effects of a mixture of BMAA and MCLR at their respective NOAELs in  
238 larval zebrafish. We exposed wild-type zebrafish embryos from 6 hpf to 6 dpf to 4  
239 different treatment conditions: 1) vehicle controls, 2) 100  $\mu$ M BMAA, 3) 1  $\mu$ M MCLR,  
240 and 4) 100  $\mu$ M BMAA + 1  $\mu$ M MCLR. As before, no overt developmental or  
241 morphological defects were observed in any exposed larvae. We then measured  
242 general locomotor activity and sensorimotor function using the same assays described  
243 above. In this cohort of animals, 100  $\mu$ M BMAA very slightly decreased total distance  
244 traveled over 18.5 min (**Figure 4A**), and all three treatment groups showed a minor  
245 reduction in average speed during the assay (**Figure 4B**). No differences were  
246 observed in turning or swimming behaviors (**Figure 4C**). These data reinforce the  
247 results from our dose-response study that BMAA and MCLR do not substantially alter  
248 locomotor activity.

249 We next measured startle frequency in the same 4 groups of larvae. **Figure 4D**  
250 highlights both the SLC and LLC response frequency disparities between zebrafish  
251 larvae exposed to BMAA/MCLR mixture solution (101 $\mu$ M) and controls. Neither 100  $\mu$ M  
252 BMAA nor 1  $\mu$ M MCLR altered startle behavior, as both SLC (**Figure 4E**) and LLC

253 sensitivity indices (**Figure 4F**) were unchanged. The 101  $\mu\text{M}$  BMAA/MCLR mixture,  
254 however, significantly enhanced SLC sensitivity (**Figure 4E**) while leaving LLC  
255 sensitivity unchanged (**Figure 4F**), in contrast to the effect of BMAA alone (**Figure 3**).  
256 These data demonstrate not only that BMAA and MCLR interact *in vivo* to enhance SLC  
257 circuit activity, but because of the different effects of the mixture and the individual  
258 toxins on LLC responses (**Figure 3C vs. Figure 4F**), they also suggest that different  
259 cellular and/or molecular mechanisms are impacted by the mixture.

260

### 261 3.3 Global Proteomics Study: Interaction amongst cyanotoxins at a molecular level

262 To explore the molecular underpinnings associated with these behavioral  
263 phenotypes, we performed shotgun proteomics on larval zebrafish exposed to 100  $\mu\text{M}$   
264 BMAA and 1  $\mu\text{M}$  MCLR alone and in combination. After behavioral testing, we carefully  
265 collected and flash-froze the treated zebrafish larvae, followed by protein extraction and  
266 digestion. Proteomes of larvae for each treatment condition were analyzed by LC-  
267 MS/MS, and approximately 3100 proteins were identified in each sample.

268 Differentially expressed proteins (DEPs) were determined by comparing the  
269 mean abundance within treatment to the control group for each protein using a two-way  
270 Student-t-test ( $P < 0.05$ ) (Tyanova et al. 2016). DEPs in all treatments can be found in  
271 **Supplemental Tables 2-4**. Volcano plots were used to visualize statistically significant  
272 differences in protein abundance across treatments in comparison to controls  
273 (**Supplemental Figure 2**). Notably, the BMAA/MCLR mixture induced the greatest  
274 molecular perturbation, with 259 DEPs compared to 79 for BMAA and 112 for MCLR,  
275 representing a 2.5-fold increase for the mixture-exposed group (**Figure 5A**). Although

276 minimal overlap in DEPs between treatments was observed, we were intrigued by the  
277 nine proteins that were significantly differentially expressed in all three treatment groups  
278 (**Figure 5B; Supplemental table 1**). Out of these nine proteins, four proteins were  
279 mapped in the enrichment analysis (**Table 1**), and their general cellular functions  
280 include roles in cellular assembly, organization, and development. Interestingly,  
281 exposure to the BMAA/MCLR mixture also enhanced the abundance of these four  
282 DEPs by at least 2.5-fold relative to the individual cyanotoxins. These results reflect an  
283 enhanced toxicity after BMAA/MCLR mixture exposure *in vivo*.

284 To further analyze the identified DEPs across treatments, we performed  
285 enrichment analysis to identify significantly perturbed pathways. **Supplemental table 5**  
286 lists all canonical pathways found to be significantly perturbed ( $z\text{-score} \geq |2|$ ) along with  
287 their associated z-scores. Exposure to the BMAA/MCLR mixture enhanced the  
288 predicted activation/inhibition of eight canonical pathways ( $z\text{-score} \geq |2|$ ) compared to  
289 BMAA (zero) and MCLR (two), which supports the observation of a synergistic  
290 interaction *in vivo* (**Figure 5C**). RhoGDI signaling ( $z\text{ score} = -2.121$ ) and calcium  
291 signaling ( $z\text{ score} = -2.449$ ) were inhibited, while signaling by Rho Family GTPases ( $z\text{-}$   
292  $\text{score} = 2.121$ ) and ILK ( $z\text{-score} = 2.121$ ) were activated. Although exposure to MCLR at 1  
293  $\mu\text{M}$  did not cause behavioral modulation, two canonical pathways were significantly  
294 affected: 1) inhibition of RhoGDI signaling ( $z\text{-score} = -2$ ), and 2) activation of signaling by  
295 Rho family GTPases ( $z\text{-score} = 2$ ) (**Figure 5C**). All four canonical pathways impacted by  
296 mixture exposure are broadly associated with neurotoxic processes related to  
297 reorganization of the actin cytoskeleton. Moreover, these pathway analysis results are  
298 reinforced by our protein interaction network analysis, in which we found significant

299 differential regulation of key proteins associated with skeletal/muscular disorder and  
300 cellular assembly/organization (**Supplemental Table 6**). Within these networks, key  
301 neuronal proteins, including cell division cycle 42 (CDC-42; Enrichment p-value=0.0049;  
302 Log<sub>2</sub> fold-change=1.8525), glutamate dehydrogenase 1 (GLUD1; Enrichment p-  
303 value=0.0299; Log<sub>2</sub> fold-change= 2.6413), and the ALS-associated TDP-43 (TARDBP;  
304 Enrichment p-value=0.0299; Log<sub>2</sub> fold-change= 2.5508) were significantly upregulated.  
305 Because TDP-43 is significantly associated with ALS disease pathology, we looked at  
306 expression of TDPBP and TDPBPL in all treatment groups. TDPBP was increased by  
307 MCLR exposure, but not BMAA exposure, and this increase was further enhanced by  
308 exposure to the BMAA/MCLR mixture (**Table 2**). Together, these data indicate that low  
309 concentrations of BMAA and MCLR in combination impact neurodegenerative  
310 processes in larval zebrafish.

311

#### 312 **4. Discussion**

313 Since the 1950s, BMAA has been investigated for its potential to contribute to  
314 neurodegenerative diseases, including amyotrophic lateral sclerosis (ALS) (Reed et al.  
315 1966). However, BMAA is only one of thousands of toxic metabolites produced by  
316 cyanobacteria (Dolman et al. 2012). While an increasing number of studies have singly  
317 addressed BMAA and its adverse effects, major knowledge gaps remain regarding the  
318 neuropathological effects of combined exposure to a cocktail of cyanotoxins. A number  
319 of studies have reported that cyanotoxins co-occur in natural environments (Banack et  
320 al. 2015; Jungblut et al. 2018; Metcalf et al. 2008; Sabart et al. 2015), including BMAA  
321 and the most abundant cyanotoxin, MCLR (McKindles et al. 2019). Although first

322 considered to be primarily a hepatotoxin, MCLR has recently been shown to have  
323 neurotoxic effects both *in vitro* and *in vivo* (Li et al. 2012; Li et al. 2015; Wang et al.  
324 2017; Wu et al. 2016). Thus, because BMAA and MCLR are ubiquitously present in the  
325 environment, have been previously detected together, and are neurotoxic, our study  
326 addresses the important question of whether they interact *in vivo* to enhance adverse  
327 effects. Building on prior work demonstrating that cyanotoxins can interact *in vitro* (Main  
328 et al. 2018; Martin et al. 2019), we show that 1) both BMAA and MCLR alter the  
329 behavior of larval zebrafish (**Figure 3**), 2) a simple binary mixture of BMAA and MCLR  
330 at low concentrations enhances behavioral neurotoxicity (**Figure 4**), and 3) BMAA and  
331 MCLR synergistically alter molecular changes associated with neuromuscular  
332 dysfunction (**Figure 5**).

333 Larval zebrafish have emerged as a powerful vertebrate model for studying  
334 neural development and behavioral circuits, as well as for translational toxicology (Tal et  
335 al. 2020; Wolman and Granato 2012). Although studying larvae is less directly relevant  
336 for studies of neurodegeneration, there is increasing evidence that developmental  
337 exposures can lead to disease later in life (Heindel and Vandenberg 2015). Indeed,  
338 neonatal exposure to BMAA has been found to cause motor defects and  
339 neurodegeneration in adult rats (Scott and Downing 2019; Scott et al. 2017). Thus,  
340 understanding the developmental impact of cyanotoxin exposure is critical for identifying  
341 potential early indicators of degenerative pathology. Here, we show that larval zebrafish  
342 behavior is modulated upon exposure to relatively low concentrations of both BMAA and  
343 MCLR in a dose-dependent manner. Although only traces of cyanotoxins have been  
344 found in large natural bodies of water (mean=41  $\mu\text{g}\cdot\text{L}^{-1}$ ) (Wiltsie et al. 2018), BMAA and

345 MCLR can be found at relatively high concentrations (from  $\sim 0.02$  to  $8 \text{ mg.kg}^{-1}$ ) in  
346 freshwater fish, crustaceans, and other types of seafood (Lance et al. 2018; Sahin et al.  
347 1996) due to bioaccumulation through the food web. Thus, our mixture paradigm is an  
348 appropriate model of natural exposures.

349 Previous studies in larval zebrafish have indicated that BMAA may cause clonus-  
350 like convulsions (Purdie et al. 2009) and pericardial edema and altered heart rate  
351 (Frøyset et al. 2016; Purdie et al. 2009). We did not observe these effects, but this could  
352 be due to differences in strain, embryo medium, exposure route, and analysis methods.  
353 In contrast to our data showing no effect on locomotion in bright light conditions (**Figure**  
354 **2**), MCLR has previously been shown to reduce activity in zebrafish larvae in a light-  
355 dark assay (Tzima et al. 2017; Wu et al. 2016). This discrepancy could also arise from  
356 strain and media differences, but in agreement with these studies, we did not observe  
357 mortality or morphological defects in MCLR-exposed larvae. However, we detected  
358 significant, dose-dependent changes in acoustic startle behavior upon exposure to both  
359 BMAA and MCLR (**Figure 3**). These data reveal a need for greater standardization in  
360 zebrafish rearing methods, and they also show that our acoustic startle assay using  
361 high-speed cameras and kinematic analysis may be a broadly useful and highly  
362 sensitive addition to standard behavioral neurotoxicity testing.

363 The increased frequency of Mauthner-cell dependent short-latency startles  
364 (SLCs) in BMAA and MCLR-treated larvae indicates that the underlying sensorimotor  
365 circuit is hyperexcitable. BMAA is known to directly agonize glutamatergic receptors  
366 (Chiu et al. 2012; 2013), so the startle hypersensitivity in BMAA-treated fish could reflect  
367 that startle circuit neurons fire more easily following acoustic stimuli. Alternatively,



368 hypersensitivity from exposure to these cyanotoxins could result from a reduction in  
369 inhibitory control of the startle circuit. Interestingly, both of these mechanisms have  
370 implications for ALS pathology, as excitotoxicity either from direct overstimulation of  
371 excitatory pathways, or from a loss of inhibitory input have been implicated in motor  
372 neuron death (Martin et al. 2012). Furthermore, our data show that BMAA and MCLR  
373 interact to enhance startle sensitivity at their respective NOAELs (**Figure 4**). To the best  
374 of our knowledge, only one previous study has examined the effects of exposure to  
375 BMAA and MCLR as a mixture. Anxiety-like behavior, exploratory behavior, and general  
376 locomotion were all found to be unchanged by acute exposure to a BMAA/MCLR  
377 mixture in the adult C57BL/6 mouse model (Myhre et al. 2018). This could indicate that  
378 the effects of the BMAA/MCLR mixture are limited to specific brain circuits, and/or that  
379 these neurotoxins exert their effects more strongly during early developmental stages  
380 (Karlsson et al. 2012; Scott et al. 2017). Future studies will examine the longer-term  
381 effects of developmental exposure to BMAA and MCLR.

382 To understand how BMAA and MCLR drive neurotoxicity, we used a label-free  
383 proteomics approach to identify the molecular pathways disrupted by BMAA/MCLR  
384 exposure in larval zebrafish. Our proteomics data display a clear trend towards  
385 enhanced toxicity in the mixture exposed group versus single exposures (**Figure 5A**),  
386 further supporting the conclusion from our behavioral data that the two toxins interact *in*  
387 *vivo*. Interestingly, DEPs displayed minimal overlap between treatments (**Figure 5B**),  
388 suggesting they act through different modes of action. It is notable that the  
389 BMAA/MCLR mixture impacted multiple critical cellular pathways, including signaling by  
390 ILK, Rho Family GTPases, RhoGDI, and calcium (**Figure 5C**), which all impinge on

391 regulation of the actin cytoskeleton. For example, overexpression of proteins in the Rho  
392 Family GTPase pathway such as CDC42 has specific effects on the actin filamentous  
393 system (Nobes and Hall 1995). CDC42 has a well-established role in triggering the  
394 formation/assembly of stress fibers mediated by Arp2/3-dependent actin nucleation  
395 (Aspenström 2019). These data are consistent with prior work showing that loss-of-  
396 function mutations in *cytoplasmic FMRP-interacting protein 2 (cyfip2)*, a key regulator of  
397 Arp2/3-mediated actin polymerization, cause startle hypersensitivity in larval zebrafish  
398 similar to that seen with BMAA/MCLR exposure (Marsden et al. 2018). In addition,  
399 previous reports show that MCLR induces neurotoxicity by triggering reorganization of  
400 actin cytoskeleton components (Li et al. 2012; Meng et al. 2011) by inhibiting  
401 serine/threonine-specific protein phosphatases (PPs) 1 and 2A (Huynh-Delerme et al.  
402 2005; MacKintosh et al. 1990). Here, we show here that MCLR in combination with  
403 BMAA at low concentrations inhibits expression of these same protein phosphatases  
404 associated with cytoskeletal organization (PP1CAB (Q7ZVR3), enrichment p-  
405 value=0.0106; Log<sub>2</sub> fold-change=-2.476; PP2CA (F1Q6Z7), enrichment p-value=0.0110;  
406 Log<sub>2</sub> fold-change=-4.03; **Supplemental table 3**). Together, our molecular proteomics  
407 data support the idea that acoustic startle hypersensitivity may be an early indicator of  
408 neuronal stress.

409 That our unbiased proteomic analysis also revealed an upregulation of TDP-43 in  
410 BMAA/MCLR-exposed larvae (**Table 2, Supplemental Table 6**) is particularly striking.  
411 Cytoplasmic TDP-43 inclusions are the key pathological hallmark in 98% of sALS  
412 cases (Mackenzie et al. 2010). Although our results cannot verify the sub-cellular  
413 localization of upregulated TDP-43, previous reports have shown that overexpression of

414 TDP-43 in the cytoplasm leads to depletion of nuclear TDP-43, which has detrimental  
 415 effects in mice (Fratta et al. 2018; Wils et al. 2010). While MCLR—but not BMAA—  
 416 exposure also increased TDP-43 expression, this increase was exacerbated by the  
 417 mixture, indicating that exposure to multiple cyanotoxins may enhance sALS disease  
 418 processes. While the molecular mechanisms that specifically drive cyanotoxin-mediated  
 419 neurotoxicity are not fully understood, our data support a model in which cyanotoxin  
 420 mixtures cause neural dysfunction through multiple disease-associated pathways.

421 Together, our data provide new evidence that cyanotoxins synergistically interact  
 422 *in vivo* to cause changes not only at the molecular level but also at the whole-organism  
 423 level, as demonstrated by altered behavioral performance. Future work will seek to link  
 424 specific molecular pathways, behavior regulation, and neuronal dysfunction, with the  
 425 goal of revealing novel therapeutic and/or diagnostic targets for intractable  
 426 neurodegenerative diseases such as ALS.

427

|                            | <b>Protein IDs</b> | <b>Gene Names</b> | <b>P Value</b> | <b>Log<sub>2</sub> Fold Change</b> |
|----------------------------|--------------------|-------------------|----------------|------------------------------------|
| <b>MCLR<br/>(1 μM)</b>     | Q4QRD2             | myl4              | 0.0029         | 1.5834                             |
|                            | Q9I8V1             | actc1b            | 0.0076         | 1.2424                             |
|                            | Q7T368             | pdhb              | 0.0187         | 1.0509                             |
|                            | Q6P0V6             | rpl8              | 0.0491         | 0.8516                             |
| <b>BMAA<br/>(100μM)</b>    | Q6P0V6             | rpl8              | 0.0023         | -0.892                             |
|                            | Q4QRD2             | myl4              | 0.0047         | 1.0115                             |
|                            | Q9I8V1             | actc1b            | 0.033          | -0.9068                            |
|                            | Q7T368             | pdhb              | 0.0487         | -0.9224                            |
| <b>Mixture<br/>(101μM)</b> | Q9I8V1             | actc1b            | 0.0002         | 5.3546                             |
|                            | Q4QRD2             | myl4              | 0.0135         | 2.7762                             |
|                            | Q6P0V6             | rpl8              | 0.0215         | 1.6328                             |
|                            | Q7T368             | pdhb              | 0.025          | 2.3007                             |

428 **Table 1:** Shared DEPs amongst treatments.

429

|                            | <b>Protein IDs</b> | <b>Gene Names</b> | <b>P Value</b> | <b>Log<sub>2</sub> Fold Change</b> |
|----------------------------|--------------------|-------------------|----------------|------------------------------------|
| <b>BMAA<br/>(100µM)</b>    | Q802C7             | tardbp            | 0.3614         | -1.3194                            |
|                            | Q6NYX2             | tardbpl           | 0.9402         | 0.0674                             |
| <b>MCLR<br/>(1µM)</b>      | Q802C7             | tardbp            | 0.0245         | 1.6390                             |
|                            | Q6NYX2             | tardbpl           | 0.7002         | 0.5127                             |
| <b>Mixture<br/>(101µM)</b> | Q802C7             | tardbp            | 0.0159         | 2.5508                             |
|                            | Q6NYX2             | tardbpl           | 0.0520         | 2.2426                             |

430 **Table 2:** Impact of cyanotoxin exposure on TDP pathway proteins.

### 431 **Conflicts of interest**

432 The authors declare no conflict of interest.

### 433 **Acknowledgments**

434 We are thankful for startup funds provided by North Carolina State University (NCSU)  
435 and for pilot project support from the Center for Human Health and Environment (P30  
436 ES025128). We also would like to thank Marsden and Bereman lab members for  
437 feedback on the manuscript. Finally, we are grateful to Derek Burton for zebrafish care  
438 and technical support for all experiments.

### 439 **Abbreviations**

440 SLC, short latency c-startle; LLC, long latency c-startle; HPLC, high-performance liquid  
441 chromatography; LC/MS, high-pressure liquid chromatography combined mass  
442 spectrometry; IPA, ingenuity pathway analysis; ANOVA, analysis of variance; GO, gene  
443 ontology; BMAA,  $\beta$ -methylamino-L-alanine; MCLR, microcystin leucine-arginine; DEPs,  
444 differentially expressed proteins.

445 **Figure Legends**

446 **Fig.1. Experimental Design.** (A) Cyanotoxin exposure plan for zebrafish from 6 hpf to  
447 6 dpf. (B) High throughput behavior testing apparatus: multi-well testing grid is mounted  
448 on an acoustic shaker above an infrared (IR) LED array and below an IR-sensitive high-  
449 speed camera. A white LED is mounted above the grid to simulate daylight conditions.  
450 Videos are analyzed with automated tracking software (FLOTE). (C) Proteomics  
451 workflow: zebrafish larvae from the mixture exposed groups were pooled for protein  
452 extraction and tryptic digestion of extracted proteins into peptides. nLC-MS/MS label  
453 free protein quantitation via MaxQuant statistical analysis via Perseus software and  
454 enrichment analysis via ingenuity pathway analysis (IPA).

455  
456 **Fig. 2. BMAA and MCLR do not substantially alter general locomotor activity.** (A)  
457 Violin plots depict the total distance travelled during the 18.5 min spontaneous  
458 movement assay for each larva. (B) Average speed across the same assay. (C) The  
459 ratio of turning movements to swimming movements performed during the spontaneous  
460 movement assay. Levels not connected by the same letter are significantly different–  
461 Tukey-Kramer HSD, Alpha 0.05.

462  
463 **Fig. 3. BMAA and MCLR significantly increase acoustic startle sensitivity.** (A)  
464 Startle frequency curves for short-latency C-bends (SLCs, left axis, sigmoidal curve fits)  
465 and long-latency C-bends (LLCs, right axis, sigmoidal curve fits) in control larvae (black)  
466 and treated larvae (1000  $\mu$ M BMAA; green).  $n = 54$  larvae; mean  $\pm$  SEM. (B) and (C),  
467 SLC and LLC sensitivity indices, calculated for each larva using the curves as in (A).

468 Levels not connected by the same letter are significantly different–Tukey-Kramer HSD,  
469 Alpha 0.05.

470

471 **Fig. 4. BMAA and MCLR interact to enhance startle sensitivity.** (A) Violin plots  
472 depict the distribution of the total distance travelled during the 18.5 min spontaneous  
473 movement assay for each larva. (B) Violin plot of average speed. (C) Ratio of turns to  
474 swims. (D) Startle frequency curves for SLCs (left axis) and LLCs (right axis) in control  
475 larvae (0  $\mu$ M of cyanotoxin, black) and mixture-treated larvae (100  $\mu$ M BMAA plus 1  $\mu$ M  
476 MCLR, purple). n = 54 siblings; mean  $\pm$  SEM. (E,F) SLC and LLC indices for each larva.  
477 Levels not connected by the same letter are significantly different–Tukey-Kramer HSD,  
478 Alpha 0.05.

479

480 **Fig. 5. BMAA/MCLR mixture increases protein dysregulation *in vivo*.** (A) Number of  
481 differentially expressed proteins (DEPs) per treatment condition. (B) Venn diagram  
482 showing overlap in DEPs between all treatment groups (red: BMAA protein group, the  
483 blue: MCLR protein group, purple: BMAA plus MCLR mixture protein group). (C) Heat  
484 map displaying the impacted canonical pathways from IPA functional analysis. The red  
485 or blue colored rectangles in each column indicates the z-score activities. Red shading  
486 indicates predicted activation and blue shading indicates predicted inhibition according  
487 to the scale at right. This heat map represents the z-scores obtained from the  
488 comparison between significantly expressed proteins ( $P \leq 0.05$ ).

489

## 490 References

- 491
- 492 Aspenström P. 2019. The intrinsic gdp/gtp exchange activities of cdc42 and rac1 are  
493 critical determinants for their specific effects on mobilization of the actin filament  
494 system. *Cells*. 8(7).
- 495 Banack SA, Caller T, Henegan P, Haney J, Murby A, Metcalf JS, Powell J, Cox PA,  
496 Stommel E. 2015. Detection of cyanotoxins,  $\beta$ -n-methylamino-l-alanine and  
497 microcystins, from a lake surrounded by cases of amyotrophic lateral sclerosis.  
498 *Toxins*. 7(2):322-336.
- 499 Banack SA, Cox PA. 2003. Distribution of the neurotoxic nonprotein amino acid bmaa in  
500 *cycas micronesica*. *Botanical Journal of the Linnean Society*. 143(2):165-168.
- 501 Bereman MS, Beri J, Enders JR, Nash T. 2018. Machine learning reveals protein  
502 signatures in csf and plasma fluids of clinical value for als. *Scientific reports*.  
503 8(1):16334-16314.
- 504 Beri J, Nash T, Martin RM, Bereman MS. 2017. Exposure to bmaa mirrors molecular  
505 processes linked to neurodegenerative disease. *PROTEOMICS*. 17(17-  
506 18):1700161-n/a.
- 507 Bozzoni V. 2016. Amyotrophic lateral sclerosis and environmental factors. *Functional*  
508 *neurology*. 31(1):7.
- 509 Bradley WG, Mash DC. 2009. Beyond guam: The cyanobacteria/bmaa hypothesis of  
510 the cause of als and other neurodegenerative diseases. *Amyotrophic Lateral*  
511 *Sclerosis*. 10(S2):7-20.
- 512 Brown RH, Al-Chalabi A. 2017. Amyotrophic lateral sclerosis. *The New England Journal*  
513 *of Medicine*. 377(2):162-172.
- 514 Burgess HA, Granato M. 2007. Modulation of locomotor activity in larval zebrafish  
515 during light adaptation. *The Journal of experimental biology*. 210(Pt 14):2526-  
516 2539.
- 517 Caller TA, Doolin JW, Haney JF, Murby AJ, West KG, Farrar HE, Ball A, Harris BT,  
518 Stommel EW. 2009. A cluster of amyotrophic lateral sclerosis in new hampshire:  
519 A possible role for toxic cyanobacteria blooms. *Amyotrophic Lateral Sclerosis*.  
520 10(S2):101-108.
- 521 Chiu AS, Gehringer MM, Braidly N, Guillemain GJ, Welch JH, Neilan BA. 2012.  
522 Excitotoxic potential of the cyanotoxin  $\beta$ -methyl-amino-l-alanine (bmaa) in  
523 primary human neurons. *Toxicon*. 60(6):1159-1165.
- 524 Chiu AS, Gehringer MM, Braidly N, Guillemain GJ, Welch JH, Neilan BA. 2013.  
525 Gliotoxicity of the cyanotoxin,  $\beta$ -methyl-amino-l-alanine (bmaa). *Scientific reports*.  
526 3(1):1482-1482.
- 527 Cox PA, Banack SA, Murch SJ, Rasmussen U, Tien G, Bidigare RR, Metcalf JS,  
528 Morrison LF, Codd GA, Bergman B et al. 2005. Diverse taxa of cyanobacteria  
529 produce  $\beta$ -n-methylamino-l-alanine, a neurotoxic amino acid. *Proceedings of the*  
530 *National Academy of Sciences of the United States of America*. 102(14):5074-  
531 5078.
- 532 Dolman AM, Rucker J, Pick FR, Fastner J, Rohrlack T, Mischke U, Wiedner C. 2012.  
533 Cyanobacteria and cyanotoxins: The influence of nitrogen versus phosphorus.  
534 *PloS one*. 7(6):e38757-e38757.

- 535 Field NC, Metcalf JS, Caller TA, Banack SA, Cox PA, Stommel EW. 2013. Linking  $\beta$ -  
536 methylamino-l-alanine exposure to sporadic amyotrophic lateral sclerosis in  
537 annapolis, md. *Toxicon*. 70:179-183.
- 538 Fratta P, Sivakumar P, Humphrey J, Lo K, Ricketts T, Oliveira H, Brito-Armas JM,  
539 Kalmar B, Ule A, Yu Y et al. 2018. Mice with endogenous tdp-43 mutations  
540 exhibit gain of splicing function and characteristics of amyotrophic lateral  
541 sclerosis. *The EMBO Journal*. 37(11):n/a-n/a.
- 542 Frøysset AK, Khan EA, Fladmark KE. 2016. Quantitative proteomics analysis of  
543 zebrafish exposed to sub-lethal dosages of  $\beta$ -methyl-amino-l-alanine (bmaa). *Sci*  
544 *Rep*. 6:29631.
- 545 Hao le T, Wolman M, Granato M, Beattie CE. 2012. Survival motor neuron affects  
546 plastin 3 protein levels leading to motor defects. *J Neurosci*. 32(15):5074-5084.
- 547 Heindel JJ, Vandenberg LN. 2015. Developmental origins of health and disease: A  
548 paradigm for understanding disease cause and prevention. *Curr Opin Pediatr*.  
549 27(2):248-253.
- 550 Huynh-Delerme C, Ederly M, Huet H, Puiseux-Dao S, Bernard C, Fontaine J-J,  
551 Crespeau F, de Luze A. 2005. Microcystin-Lr and embryo-larval development of  
552 medaka fish, *oryzias latipes*. I. Effects on the digestive tract and associated  
553 systems. *Toxicon*. 46(1):16-23.
- 554 Ingre C, Roos PM, Piehl F, Kamel F, Fang F. 2015. Risk factors for amyotrophic lateral  
555 sclerosis. *Clinical epidemiology*. 7:181-193.
- 556 Jones N. 2009. Genetic risk factors for sporadic als. *Nature Reviews Neurology*.  
557 5(11):579-579.
- 558 Jungblut AD, Wilbraham J, Banack SA, Metcalf JS, Codd GA. 2018. Microcystins, bmaa  
559 and bmaa isomers in 100-year-old antarctic cyanobacterial mats collected during  
560 captain r.f. Scott's discovery expedition. *European Journal of Phycology*.  
561 53(2):115.
- 562 Karlsson O, Berg A-L, Lindström A-K, Hanrieder J, Arnerup G, Roman E, Bergquist J,  
563 Lindquist NG, Brittebo EB, Andersson M et al. 2012. Neonatal exposure to the  
564 cyanobacterial toxin bmaa induces changes in protein expression and  
565 neurodegeneration in adult hippocampus. *Toxicological sciences : an official*  
566 *journal of the Society of Toxicology*. 130(2):391-404.
- 567 Karlsson O, Michno W, Ransome Y, Hanrieder J. 2017. Maldi imaging delineates  
568 hippocampal glycosphingolipid changes associated with neurotoxin induced  
569 proteopathy following neonatal bmaa exposure. *BBA - Proteins and Proteomics*.  
570 1865(7):740-746.
- 571 Khatri P, Drăghici S. 2005. Ontological analysis of gene expression data: Current tools,  
572 limitations, and open problems. *Bioinformatics (Oxford, England)*. 21(18):3587-  
573 3595.
- 574 Kurland LT, Mulder DW. 1955. Epidemiologic investigations of amyotrophic lateral  
575 sclerosis. 2. Familial aggregations indicative of dominant inheritance. II.  
576 *Neurology*. 5(4):249.
- 577 Lance E, Arnich N, Maignien T, Biré R. 2018. Occurrence of  $\beta$ -n-methylamino-l-alanine  
578 (bmaa) and isomers in aquatic environments and aquatic food sources for  
579 humans. Switzerland: MDPI AG. p. 83.



- 580 Li G, Cai F, Yan W, Li C, Wang J. 2012. A proteomic analysis of mclr-induced  
581 neurotoxicity: Implications for alzheimer's disease. *Toxicological sciences : an*  
582 *official journal of the Society of Toxicology.* 127(2):485-495.
- 583 Li G, Yan W, Dang Y, Li J, Liu C, Wang J. 2015. The role of calcineurin signaling in  
584 microcystin-Lr triggered neuronal toxicity. *Scientific reports.* 5(1):11271-11271.
- 585 Lobner D, Piana PMT, Salous AK, Peoples RW. 2006. B- n -methylamino- l -alanine  
586 enhances neurotoxicity through multiple mechanisms. *Neurobiology of Disease.*  
587 25(2):360-366.
- 588 Mackenzie IR, Rademakers R, Neumann M. 2010. Tdp-43 and fus in amyotrophic  
589 lateral sclerosis and frontotemporal dementia. *Lancet Neurol.* 9(10):995-1007.
- 590 MacKintosh C, Beattie KA, Klumpp S, Cohen P, Codd GA. 1990. Cyanobacterial  
591 microcystin-Lr is a potent and specific inhibitor of protein phosphatases 1 and 2a  
592 from both mammals and higher plants. *FEBS Letters.* 264(2):187-192.
- 593 Main BJ, Main BJ, Rodgers KJ, Rodgers KJ. 2018. Assessing the combined toxicity of  
594 bmaa and its isomers 2,4-dab and aeg in vitro using human neuroblastoma cells.  
595 *Neurotoxicity Research.* 33(1):33-42.
- 596 Marquart GD, Tabor KM, Bergeron SA, Briggman KL, Burgess HA. 2019. Prepontine  
597 non-giant neurons drive flexible escape behavior in zebrafish. *PLOS Biology.*  
598 17(10):e3000480-e3000480.
- 599 Marsden KC, Jain RA, Wolman MA, Echeverry FA, Nelson JC, Hayer KE, Miltenberg B,  
600 Pereda AE, Granato M. 2018. A cyfip2-dependent excitatory interneuron pathway  
601 establishes the innate startle threshold. *Cell reports.* 23(3):878-887.
- 602 Martin LJ, Martin LJ, Chang Q, Chang Q. 2012. Inhibitory synaptic regulation of  
603 motoneurons: A new target of disease mechanisms in amyotrophic lateral  
604 sclerosis. *Molecular Neurobiology.* 45(1):30-42.
- 605 Martin RM, Stallrich J, Bereman MS. 2019. Mixture designs to investigate adverse  
606 effects upon co-exposure to environmental cyanotoxins. *Toxicology.* 421:74-83.
- 607 Masseret E, Banack S, Boumédiène F, Abadie E, Brient L, Pernet F, Juntas-Morales R,  
608 Pageot N, Metcalf J, Cox P et al. 2013. Dietary bmaa exposure in an  
609 amyotrophic lateral sclerosis cluster from southern france. *PLoS one.*  
610 8(12):e83406-e83406.
- 611 McKindles KM, Zimba PV, Chiu AS, Watson SB, Gutierrez DB, Westrick J, Kling H,  
612 Davis TW. 2019. A multiplex analysis of potentially toxic cyanobacteria in lake  
613 winnipeg during the 2013 bloom season. *Toxins.* 11(10):587.
- 614 Meng G, Sun Y, Fu W, Guo Z, Xu L. 2011. Microcystin-Lr induces cytoskeleton system  
615 reorganization through hyperphosphorylation of tau and hsp27 via pp2a inhibition  
616 and subsequent activation of the p38 mapk signaling pathway in neuroendocrine  
617 (pc12) cells. Ireland: Elsevier Ireland Ltd. p. 218-229.
- 618 Metcalf JS, Banack SA, Lindsay J, Morrison LF, Cox PA, Codd GA. 2008.  
619 Co-occurrence of  $\beta$ -n-methylamino-l-alanine, a neurotoxic amino acid with other  
620 cyanobacterial toxins in british waterbodies, 1990–2004. Oxford, UK: Blackwell  
621 Publishing Ltd. p. 702-708.
- 622 Metcalf JS, Richer R, Cox PA, Codd GA. 2012. Cyanotoxins in desert environments  
623 may present a risk to human health. *Science of the Total Environment.* 421-  
624 422:118-123.

- 625 Myhre O, Eide DM, Kleiven S, Utkilen HC, Hofer T. 2018. Repeated five-day  
626 administration of l-bmaa, microcystin-lr, or as mixture, in adult c57bl/6 mice - lack  
627 of adverse cognitive effects. *Scientific reports*. 8(1):2308-2314.
- 628 Nobes CD, Hall A. 1995. Rho, rac, and cdc42 gtpases regulate the assembly of  
629 multimolecular focal complexes associated with actin stress fibers, lamellipodia,  
630 and filopodia. *Cell*. 81(1):53-62.
- 631 Purdie EL, Samsudin S, Eddy FB, Codd GA. 2009. Effects of the cyanobacterial  
632 neurotoxin  $\beta$ - n-methylamino-l-alanine on the early-life stage development of  
633 zebrafish ( danio rerio). *Aquatic Toxicology*. 95(4):279-284.
- 634 Reed D, Plato C, Elizan T, Kurland LT. 1966. The amyotrophic lateral  
635 sclerosis/parkinsonism-dementia complex: A ten-year follow-up on guam. I.  
636 *Epidemiologic studies*. United States. p. 54.
- 637 Renton AE, Chiò A, Traynor BJ. 2014. State of play in amyotrophic lateral sclerosis  
638 genetics. *Nature neuroscience*. 17(1):17-23.
- 639 Sabart M, Crenn K, Perrière F, Abila A, Lereboure M, Colombet J, Jousse C, Latour  
640 D. 2015. Co-occurrence of microcystin and anatoxin-a in the freshwater lake  
641 aydat (france): Analytical and molecular approaches during a three-year survey.  
642 *Harmful Algae*. 48:12-20.
- 643 Sahin A, Tencalla FG, Dietrich DR, Naegeli H. 1996. Biliary excretion of biochemically  
644 active cyanobacteria (blue-green algae) hepatotoxins in fish. Ireland: Elsevier  
645 Ireland Ltd. p. 123-130.
- 646 Scott L, Downing T. 2019. Dose-dependent adult neurodegeneration in a rat model after  
647 neonatal exposure to  $\beta$ -n-methylamino-l-alanine. *Neurotoxicity Research*.  
648 35(3):711-723.
- 649 Scott LL, Downing TG, Timothy D, Laura S. 2017. A single neonatal exposure to bmaa  
650 in a rat model produces neuropathology consistent with neurodegenerative  
651 diseases. *Toxins*. 10(1):22.
- 652 Swinnen B, Robberecht W. 2014. The phenotypic variability of amyotrophic lateral  
653 sclerosis. *Nature reviews Neurology*. 10(11):661-670.
- 654 Tal T, Yaghoobi B, Lein PJ. 2020. Translational toxicology in zebrafish. *Current opinion*  
655 *in toxicology*.
- 656 Tyanova S, Temu T, Sinitcyn P, Carlson A, Hein MY, Geiger T, Mann M, Cox J. 2016.  
657 The perseus computational platform for comprehensive analysis of (prote)omics  
658 data. *Nature methods*. 13(9):731-740.
- 659 Tzima E, Serifi I, Tsikari I, Alzualde A, Leonardos I, Papamarcaki T. 2017.  
660 Transcriptional and behavioral responses of zebrafish larvae to microcystin-lr  
661 exposure. *International journal of molecular sciences*. 18(2):365.
- 662 Wang B, Liu J, Huang P, Xu K, Wang H, Wang X, Guo Z, Xu L. 2017. Protein  
663 phosphatase 2a inhibition and subsequent cytoskeleton reorganization  
664 contributes to cell migration caused by microcystin-lr in human laryngeal  
665 epithelial cells (hep-2). United States: Wiley Subscription Services, Inc. p. 890-  
666 903.
- 667 Wang Q, Xie P, Chen J, Liang G. 2008. Distribution of microcystins in various organs  
668 (heart, liver, intestine, gonad, brain, kidney and lung) of wistar rat via intravenous  
669 injection. *Toxicol*. 52(6):721-727.

- 670 Wils H, Kleinberger G, Janssens J, Pereson S, Joris G, Cuijt I, Smits V, Ceuterick-de  
671 Groote C, Van Broeckhoven C, Kumar-Singh S. 2010. Tdp-43 transgenic mice  
672 develop spastic paralysis and neuronal inclusions characteristic of als and  
673 frontotemporal lobar degeneration. *Proc Natl Acad Sci U S A*. 107(8):3858-3863.
- 674 Wiltse D, Schnetzer A, Green J, Vander Borgh M, Fensin E. 2018. Algal blooms and  
675 cyanotoxins in jordan lake, north carolina. *Toxins*. 10(2):92.
- 676 Wolman M, Granato M. 2012. Behavioral genetics in larval zebrafish: Learning from the  
677 young. Hoboken: Wiley Subscription Services, Inc., A Wiley Company. p. 366-  
678 372.
- 679 Wu Q, Yan W, Liu C, Li L, Yu L, Zhao S, Li G. 2016. Microcystin-Lr exposure induces  
680 developmental neurotoxicity in zebrafish embryo. *Environmental Pollution*.  
681 213:793-800.
- 682 Zhao S, Li G, Chen J. 2015. A proteomic analysis of prenatal transfer of microcystin-Lr  
683 induced neurotoxicity in rat offspring. *J Proteomics*. 114:197-213.
- 684

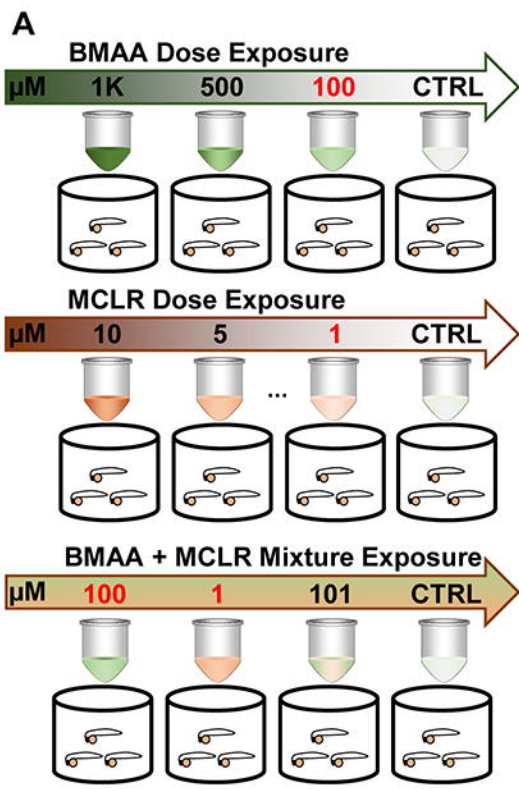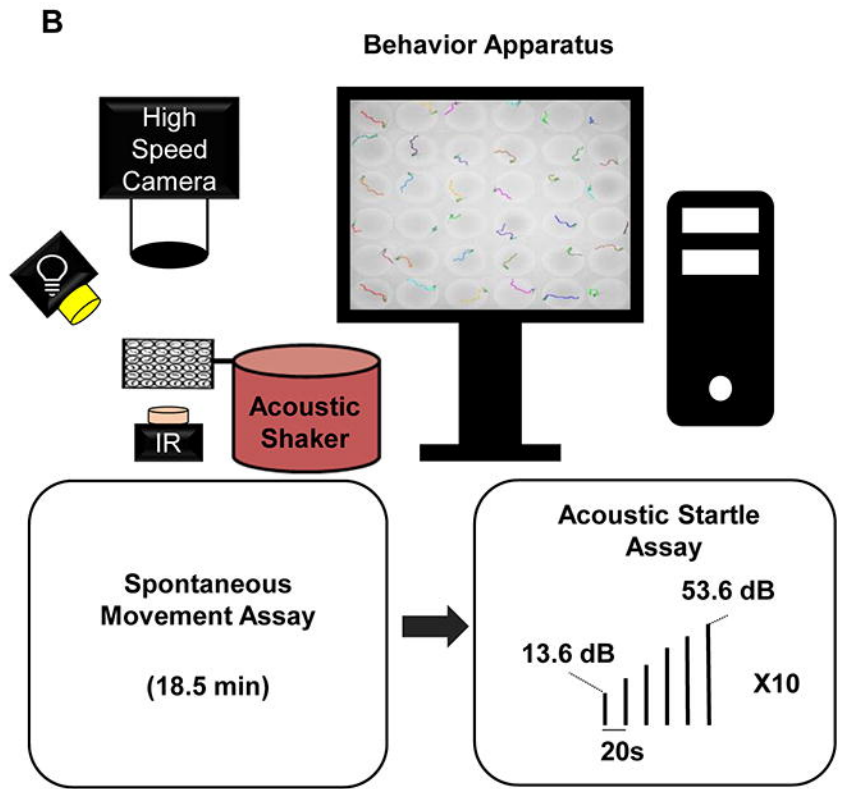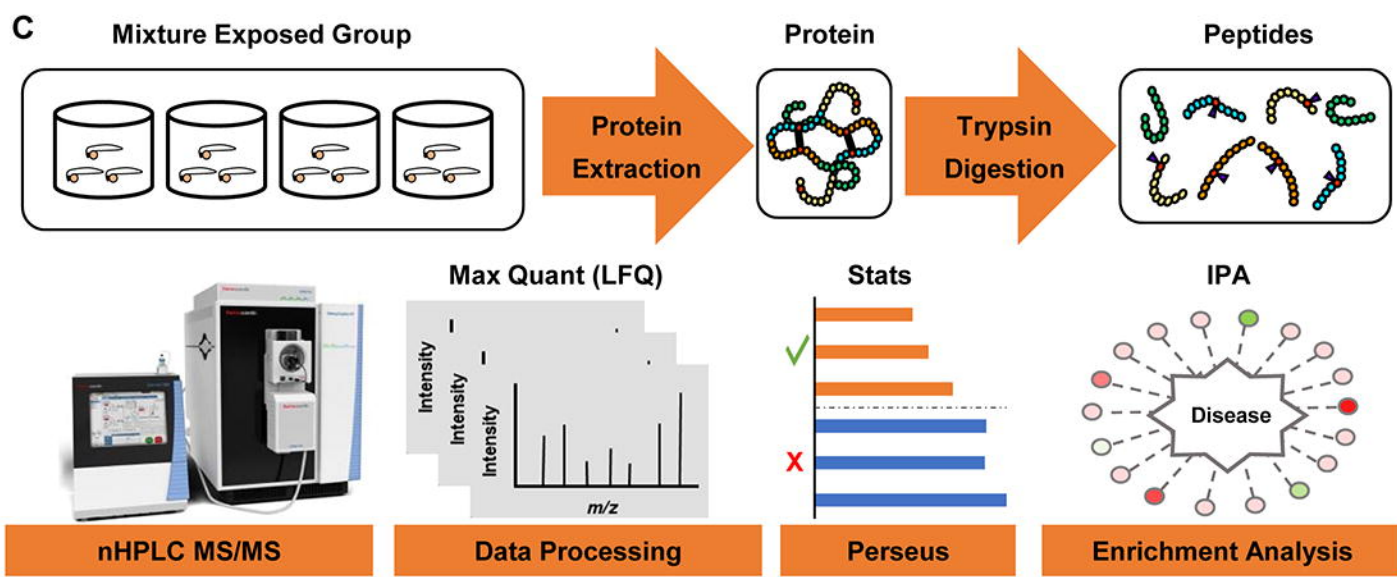

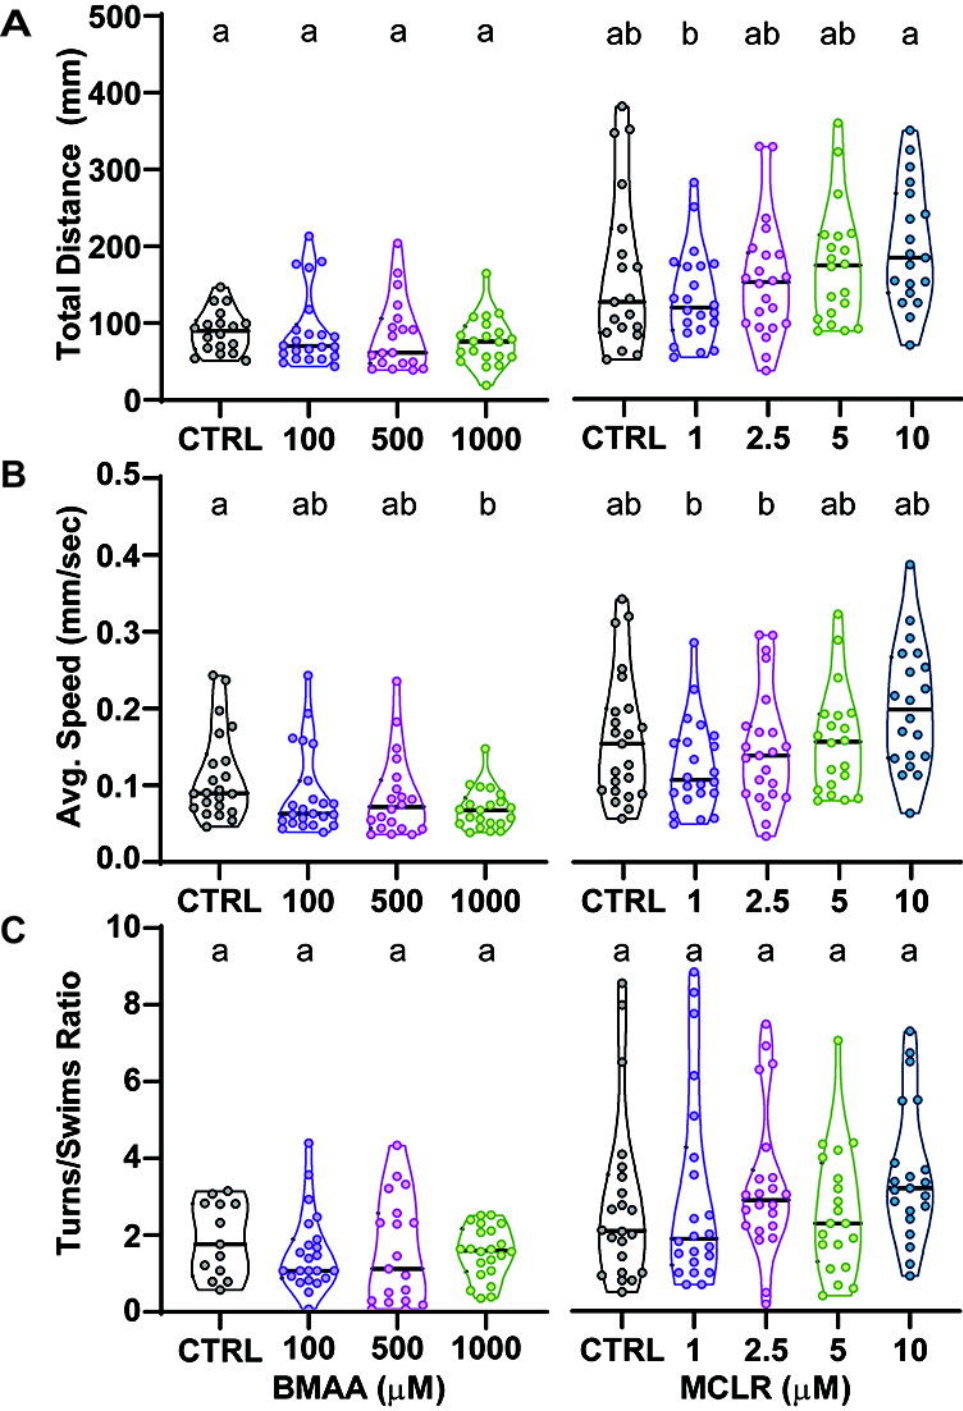

A

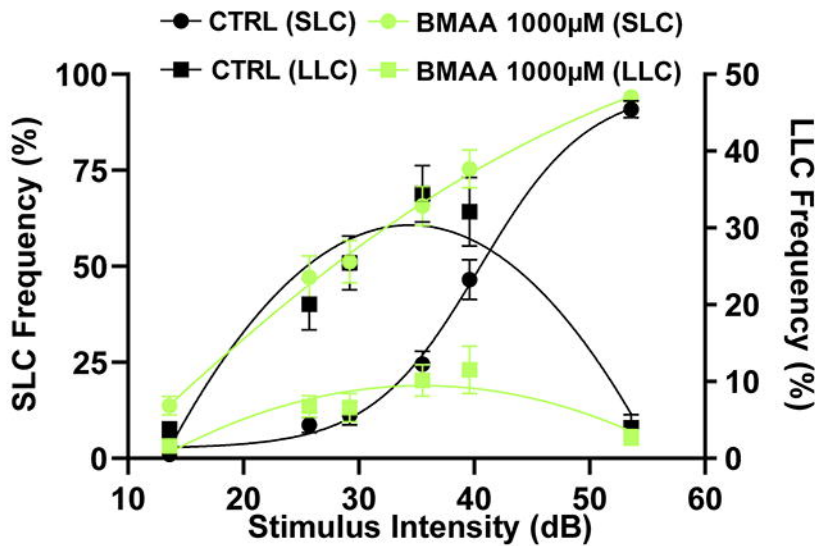

B

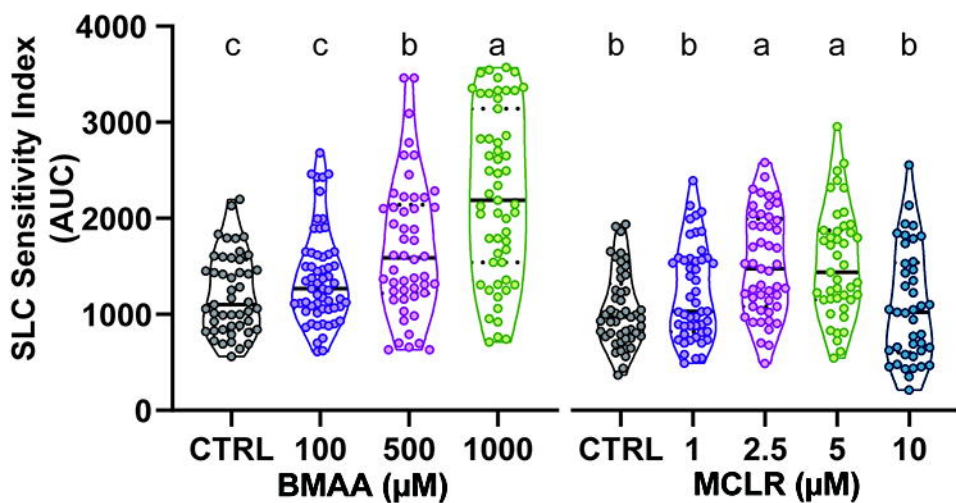

C

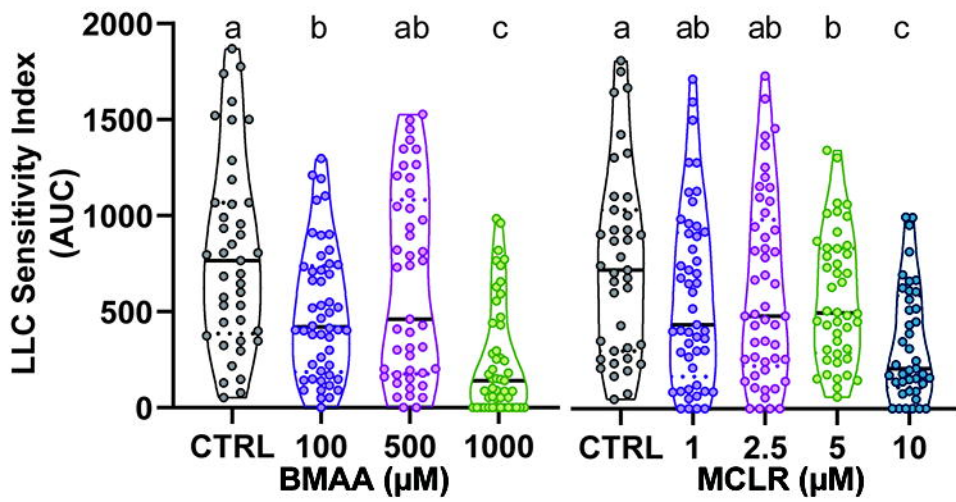

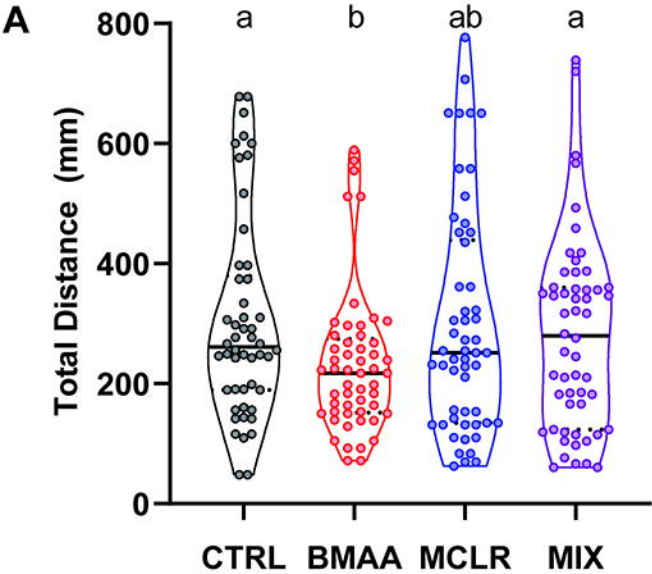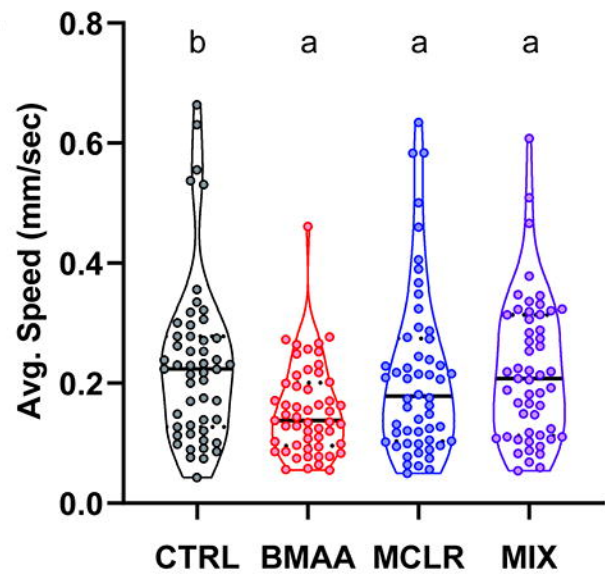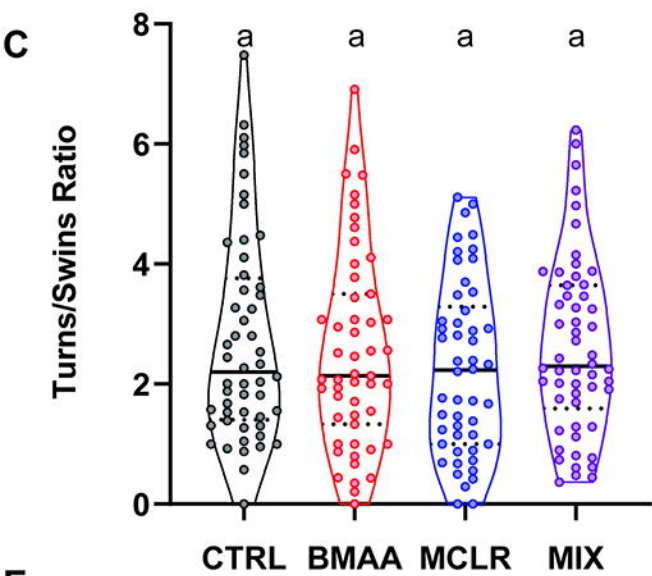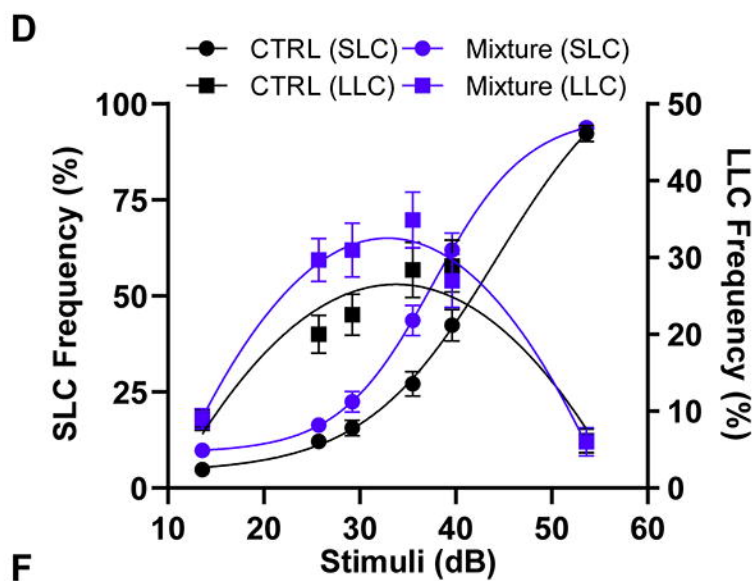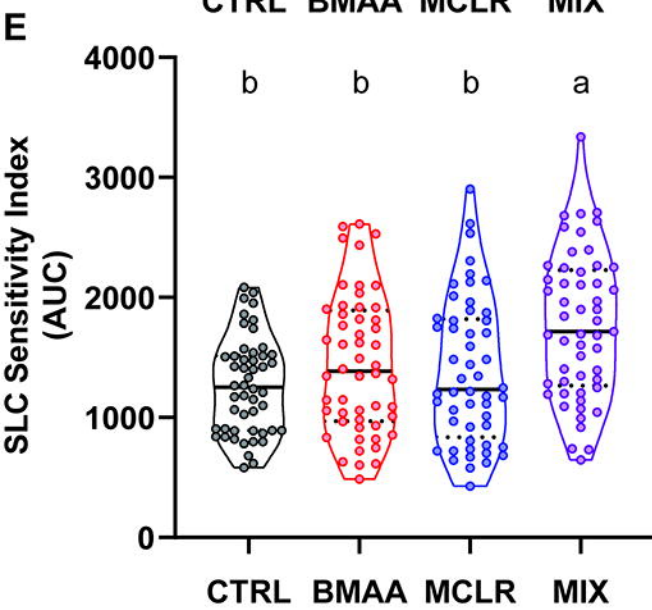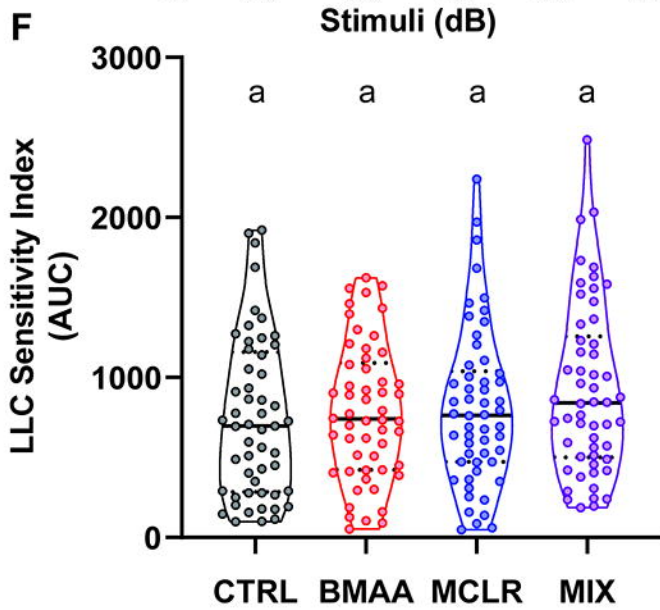

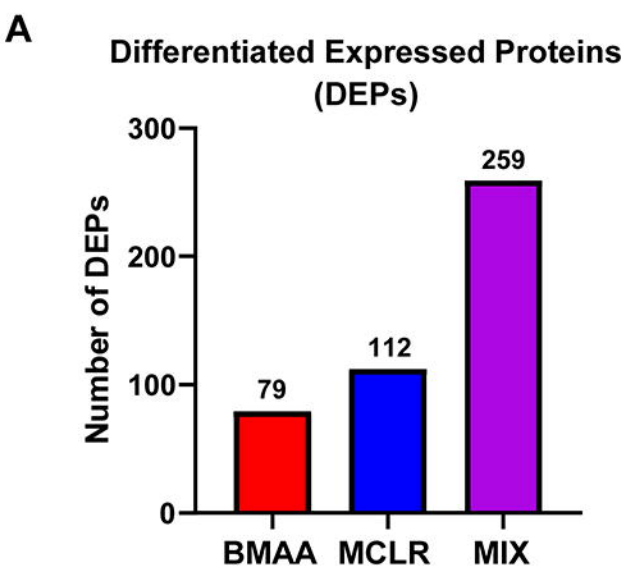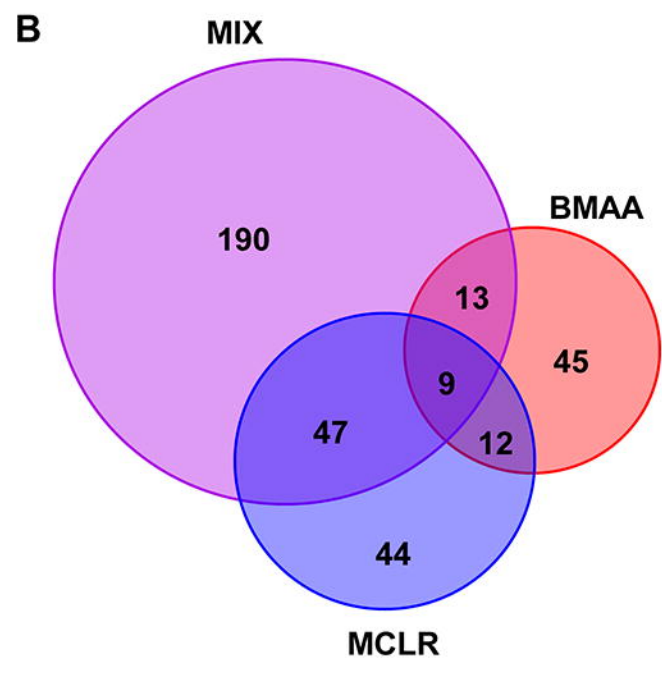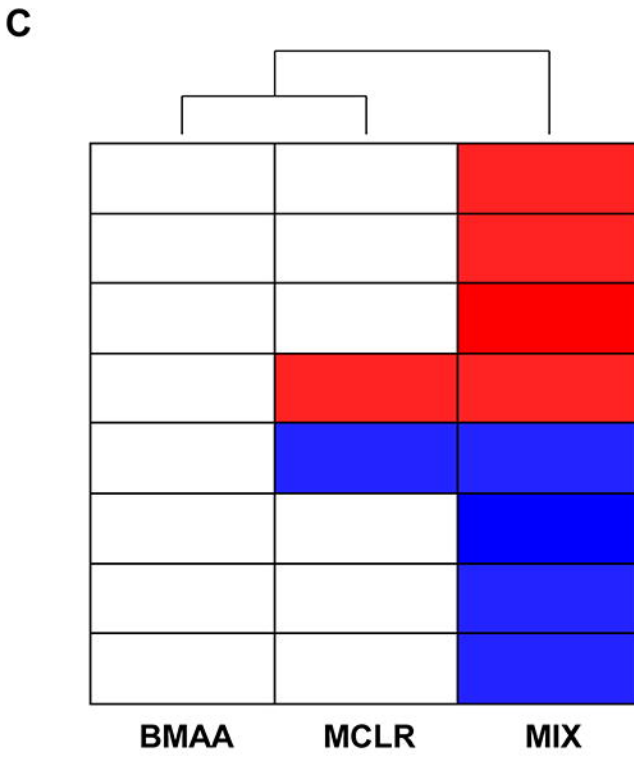

Canonical Pathways

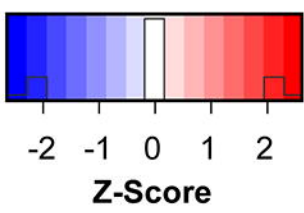

Source: https://www.biorxiv.org/content/10.1101/2020.07.15.205617v1.full.pdf
